# Supplementary material
Source: PubMed Central journal article supplement (PMC3650709)
Supplement: supp_blood-2012-12-474601_blood-2012-12-474601-1.pdf [file supp_blood-2012-12-474601_blood-2012-12-474601-1.pdf]

## **Supplemental Materials and Methods**

### **Cell culture.**

Human Umbilical Vein Endothelial Cell (HUVEC) and HMVEC-dLyAd-Adult Human Dermal Lymphatic Microvascular Endothelial Cells (HDLEC) were purchased from Lonza. HUVEC were cultured in M199 medium supplemented with 20% FBS, 100µg/ml ECGS and 100µg/ml heparin (Sigma). (HDLEC) were purchased from Lonza. HDLEC were cultured in EBM-2MV medium (Lonza). HUVEC and HDLEC at passage 2 to 5 were used for experiment. Human Embryonic Kidney (HEK) 293 cells were cultured in DMEM with 10% FBS. All cells were cultured in 5% CO<sub>2</sub> at 37 degree.

### **Production and infection of lentiviruses and adenoviruses**

Production of *pLVX-HA-RAF1 WT*, *-S259A* and *-mCherry* lentiviruses and constitutive active ERK adenoviruses were described previously<sup>32</sup>. Control lentiviruses were generated using pLVX-IRES-puro vector. For lentiviral infection, cells were incubated with the lentivirus in growth medium in the presence of 8 µg/ml polybrene (Sigma) for 8 hours. For adenoviral infection, cells were incubated with the adenovirus (MOI=100) in growth medium for overnight.

### **X-gal staining**

X-gal staining was performed using a β-Gal Expression kit from Millipore followed the manufacturer's instruction.

### **RNAi**

Human *SEMA6A*, *NTNG1* and *EFNB2* Flexitube siRNAs and AllStars Negative Control siRNA were purchased from QIAGEN, Inc. Cells cultured in 6-well plate at 50% confluence were transfected with 5nmol siRNA using TransPass R2 Transfection Reagent (NEB) following

the manufacturer's instructions. Forty eight hours post siRNA transfection, cells were used for experiments. Knocking down efficiency was determined by qPCR or Western blotting.

### Supplemental figure legends

#### **Figure S1. Endothelial-expression of *RAF1*<sup>S259A</sup> blocks inhibition of RAF1 by AKT.**

(A) RAF1-AKT crosstalk. Upon extracellular signal stimulation, AKT phosphorylates RAF1 at serine 259 and inhibits RAF1 activation. (B) Immunoblot of HUVECs infected with empty control, wild type HA-*RAF1* (WT) or HA-*RAF1*<sup>S259A</sup> (S259A) lentiviruses. (C) Immunoblot showing RAF1 expression in E14.5 yolk sac. (D) RAF1 protein levels shown in (C) were quantified by densitometry and are represented as ratio of RAF1 versus  $\beta$ -tubulin.

**Figure S2. Whole mount immunofluorescent staining of E14.5 (A) and E15.5 (B) skin.** The dorsal skin of S259A embryos and the control littermates were stained with indicated antibodies. CX40 and Endomucin stain arteries and veins respectively. Scale bars: 50  $\mu$ m (A); 200  $\mu$ m (B). a, artery; v, vein.

#### **Figure S3. Decreased capillary bed size in S259A embryos.**

(A) Whole mount immunofluorescent staining of E14.5 skin. (B and C) Quantitative analysis of branch points (B) and number of vessel segments (C) based on CD31 staining shown in (A). Control, n=6 embryos; S259A, n=4 embryos. Mean $\pm$ SEM. (D) Wholemount immunofluorescent staining of E12.5 yolk sacs. (E) Quantitative analysis of vessels based on CD31 staining shown in (D). Control, n=5 embryos; S259A, n=5 embryos. Mean $\pm$ SEM. For quantitative analysis of all of the above quantitative images, at least 6 random areas from each skin or yolk sac were quantified and averaged to represent that of one embryo.

#### **Figure S4. cDNA microarray analysis of *RAF1*<sup>S259A</sup>-induced gene expression.**

(A) PCA map of cDNA microarray of HUVECs infected with empty control, wild type HA-*RAF1* (WT) or HA-*RAF1*<sup>S259A</sup> (S259A) lentiviruses. (B) Overlapping of *RAF1* WT and S259A-induced genes with expression values equal or more than 1.5-fold different compared to Control cells were considered significant. The numbers of shared or uniquely regulated are indicated. (C) A sub-list of differentially expressed genes between Control, *RAF1* WT and S259A cells.

**Figure S5. *RAF1*-AKT crosstalk controls VEGF-induced *DLL4* expression.**

qPCR analysis of *DLL4* expression in U0126 and LY294002 pre-treated HUVECs (A) or HDLECs (B) upon VEGF-A or VEGF-C stimulation at indicated time points.

**Figure S6. Summary of guidance molecule expression in HUVECs transduced with control, wild type *RAF1* or *RAF1*<sup>S259A</sup> lentiviruses.**

Expression of repulsion molecules such as the *Semaphorins*, the *Netrins*, the *Slits*, the *Ephrins* and their receptors was determined by cDNA microarray of HUVECs transduced with control, wild type *RAF1* or *RAF1*<sup>S259A</sup> lentiviruses. Data represents Mean ±SEM of the cDNA array score of four independent cDNA microarrays.

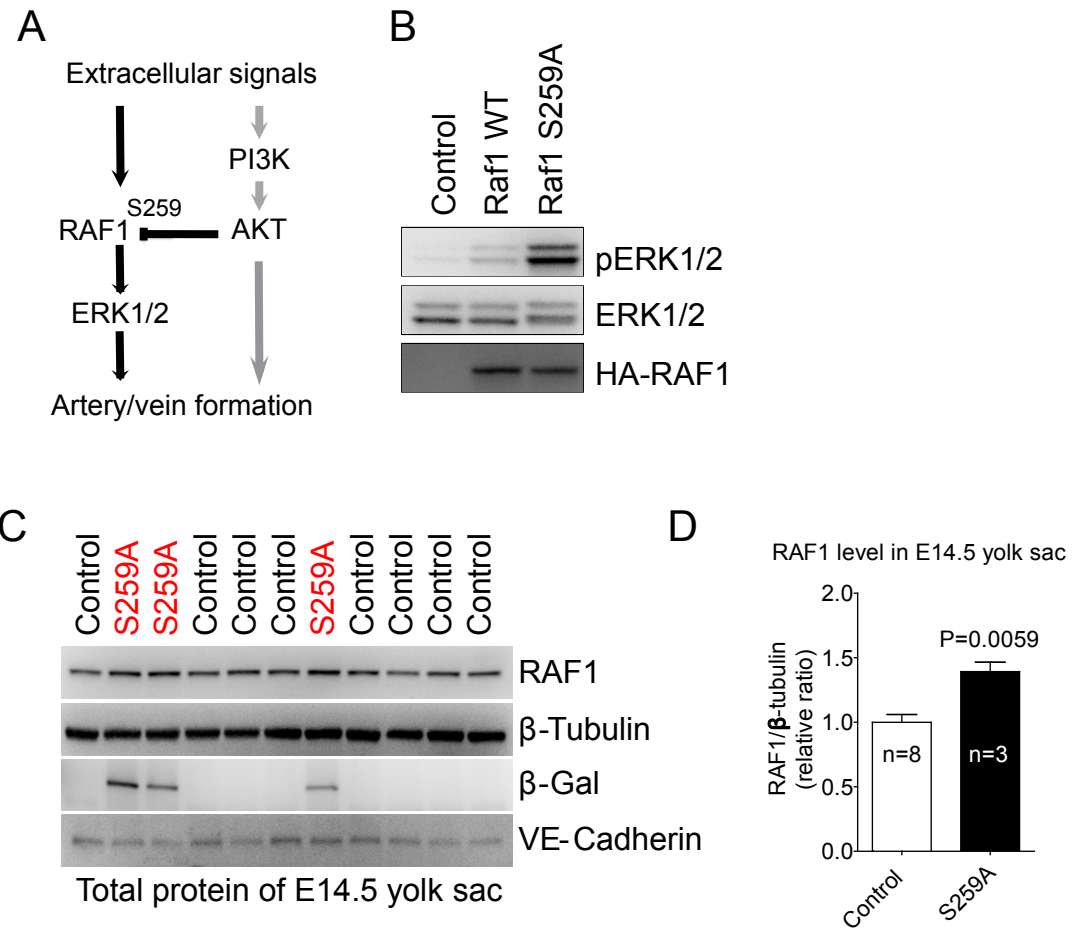

Figure S1

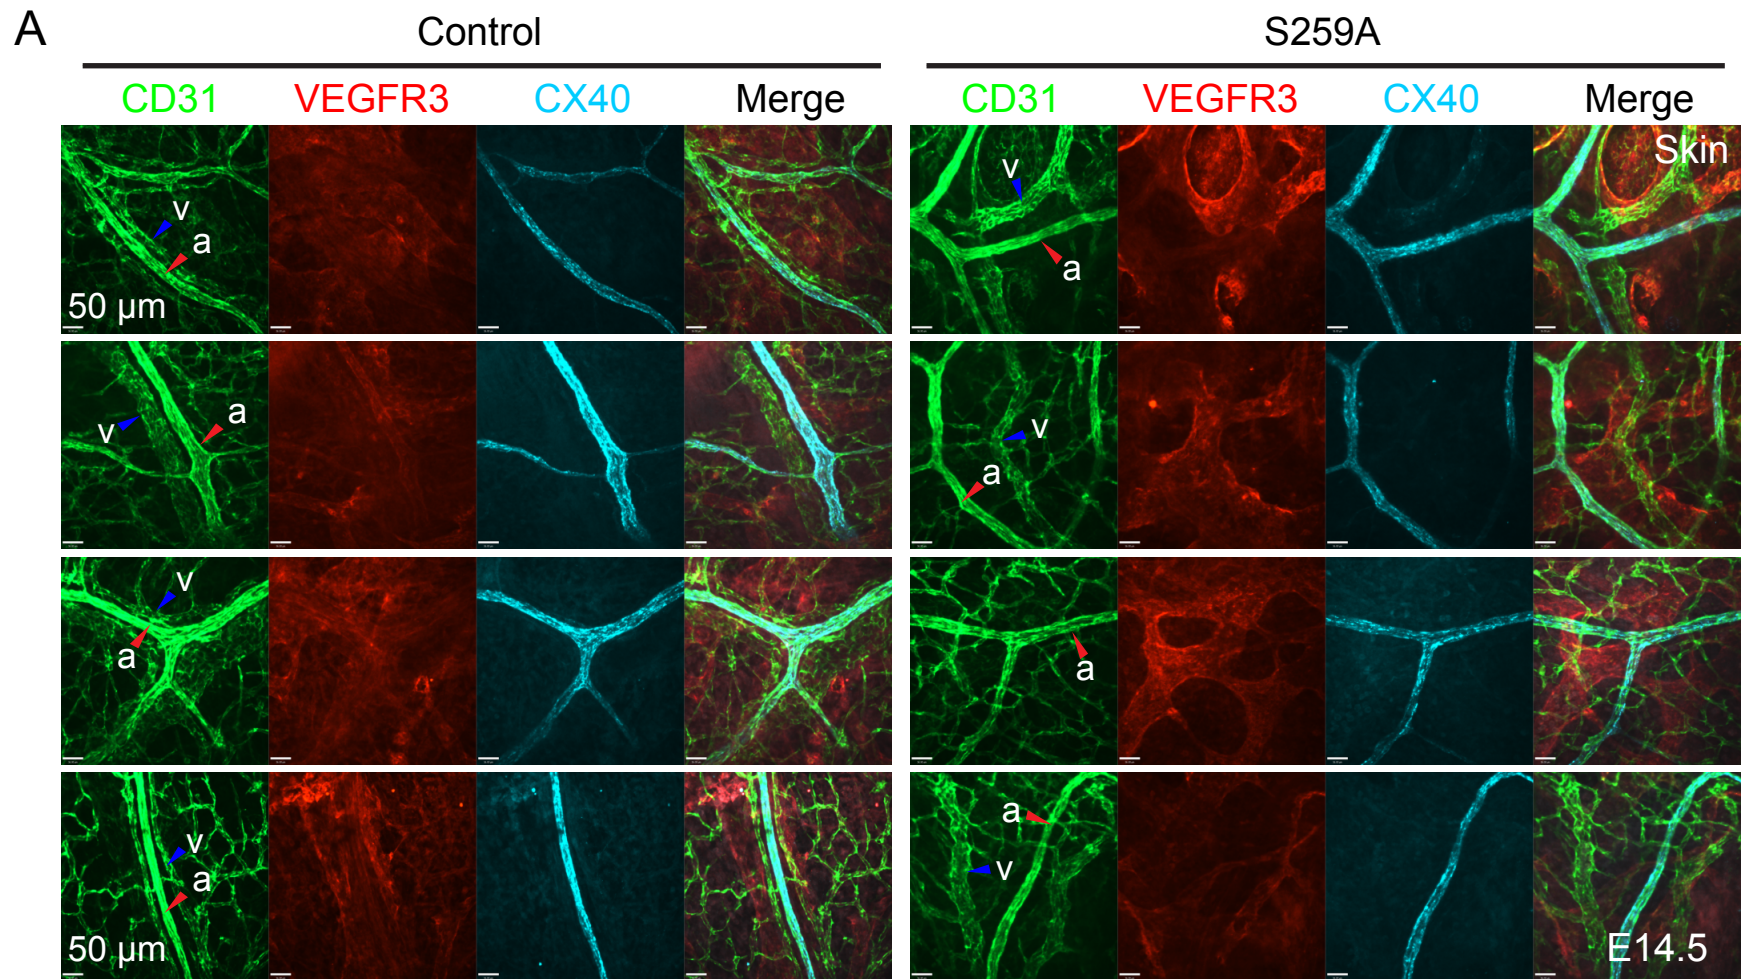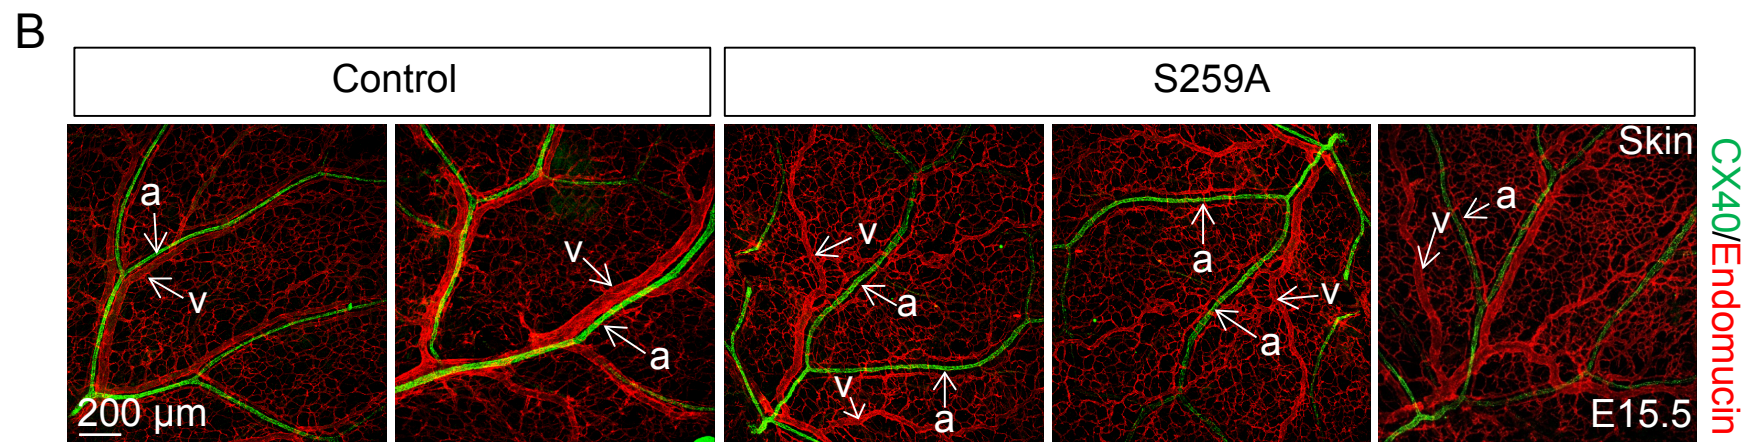

Figure S2

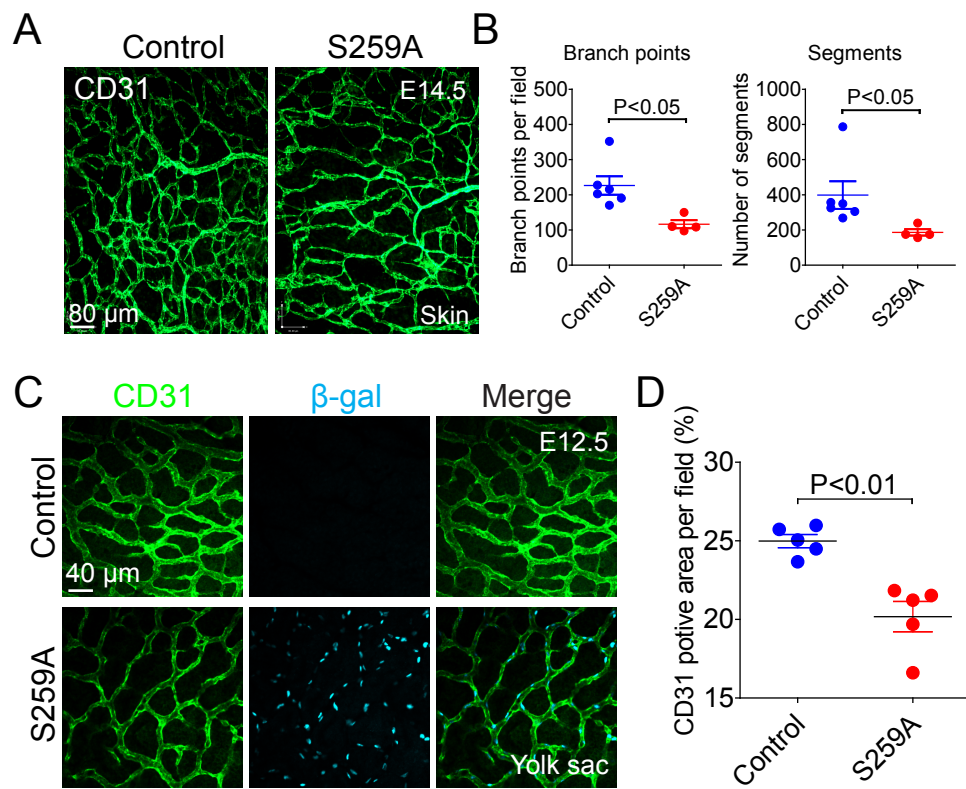

Figure S3

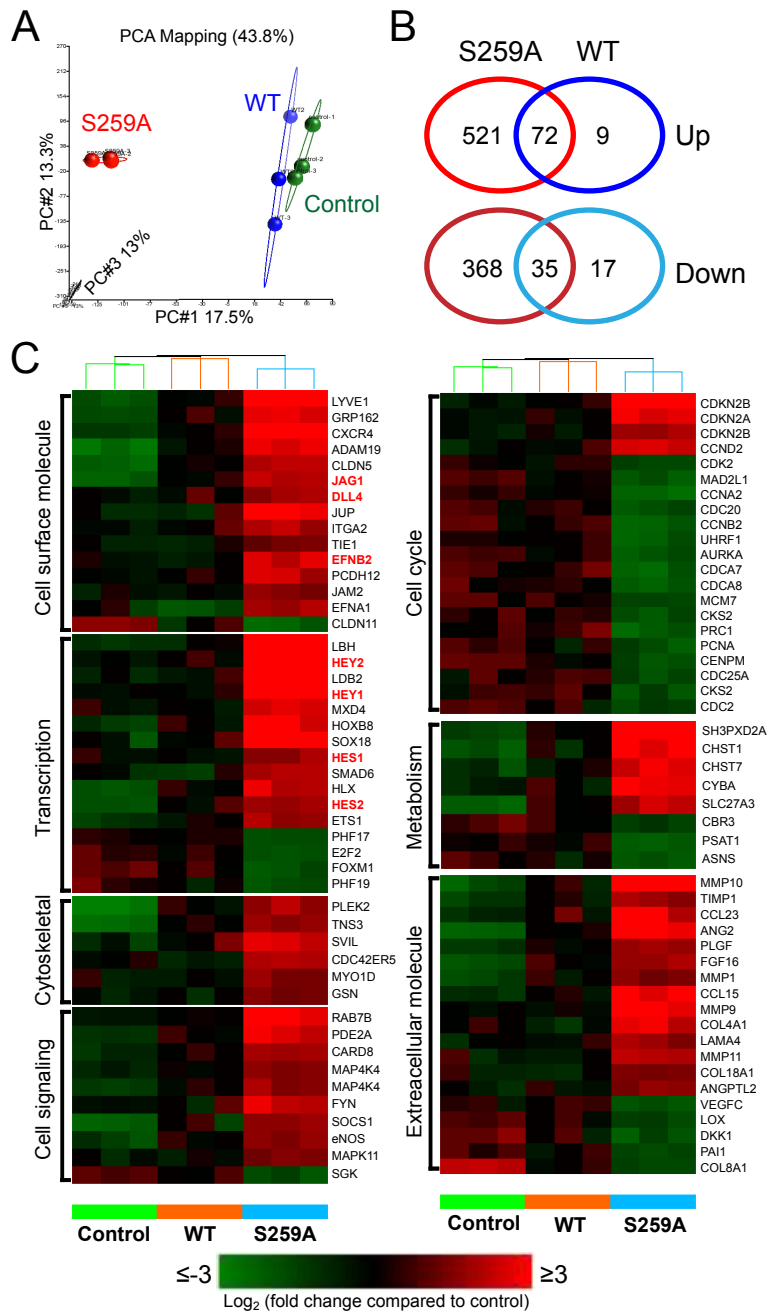

Figure S4

**A**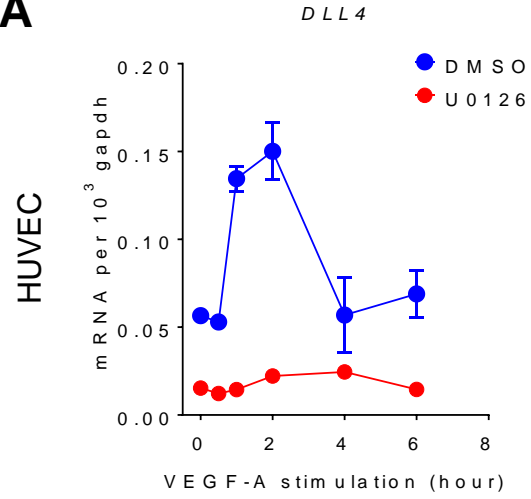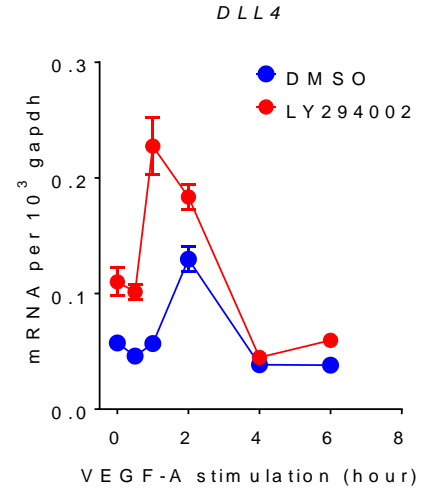**B**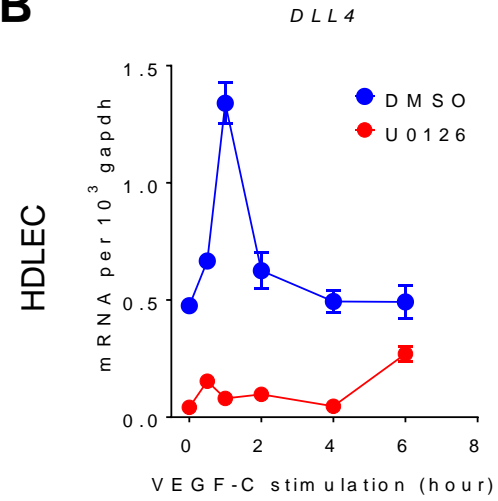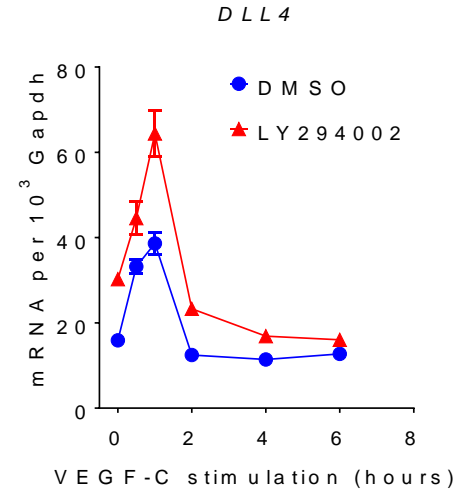

Figure S5



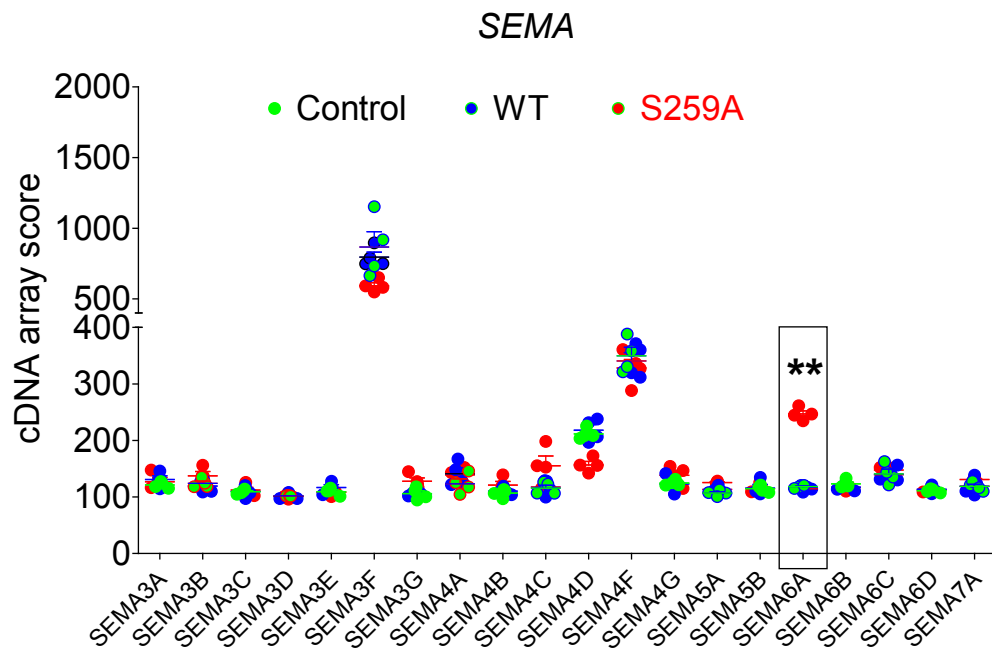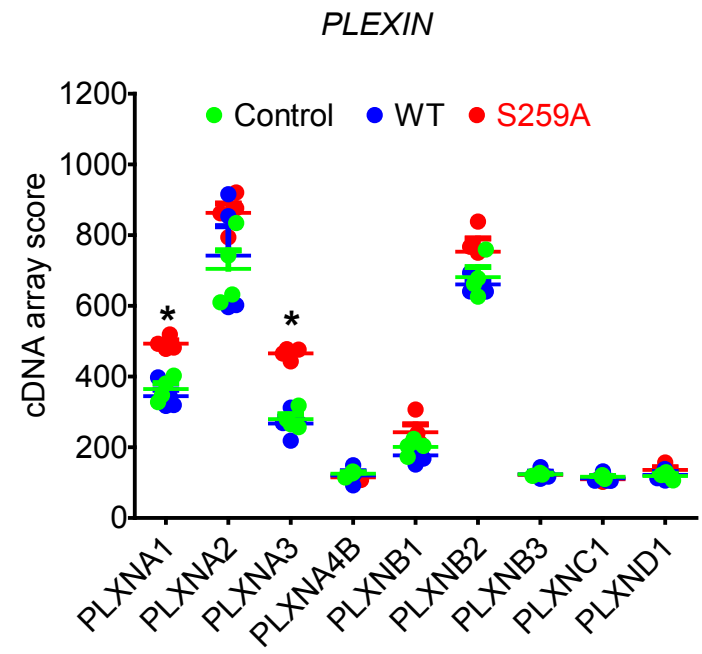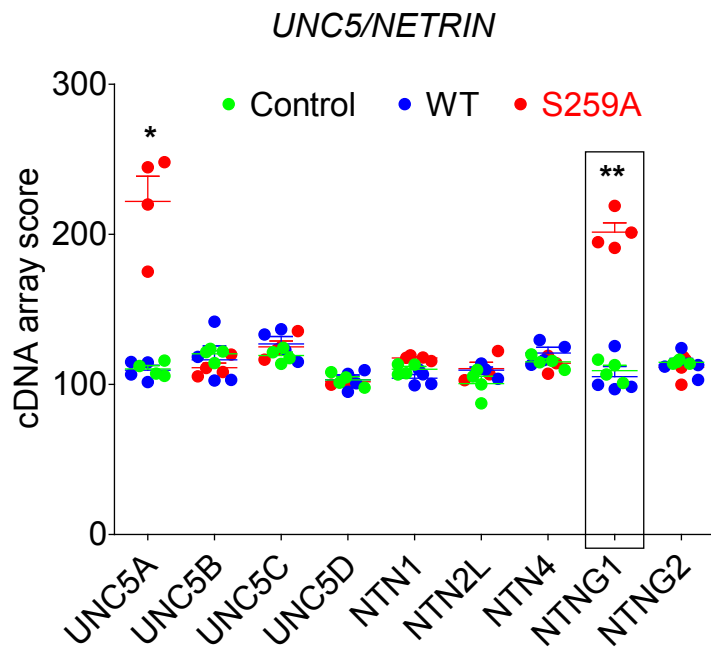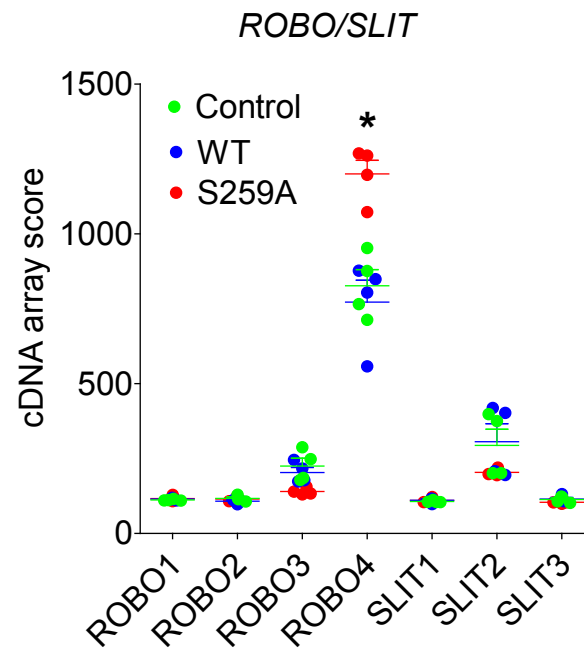

Figure S6
